# Supplementary material
Source: PubMed Central journal article supplement (PMC10717207)
Supplement: 12576_2014_354_MOESM3_ESM.pdf [file 12576_2014_354_MOESM3_ESM.pdf]

# Supplemental Table 3

## A

| Parameter | Value |
|-----------|-------|
| a         | 2     |
| b         | 2     |
| s         | 5.6   |
| e         | 1     |
| f         | 0.5   |
| d         | 1     |
| h         | 0.2   |
| g         | 2     |
| i         | 0.22  |
| j         | 0.44  |
| k         | 0.1   |
| r         | 0.2   |
| p         | 0.2   |
| c         | 0.25  |
| K1        | 2     |
| K2        | 0.2   |

## Parameter

## Value

|    |     |
|----|-----|
| K3 | 0.2 |
| N1 | 2   |
| N2 | 3   |
| N3 | 2   |

## B

| Name  | Initial value |
|-------|---------------|
| cAMP  | 1             |
| Ca    | 0.1           |
| PKA   | 0.05          |
| PDE   | 0             |
| AC5/6 | 0.5           |
| AC4/7 | 0.5           |
