# Supplementary material
Source: PubMed Central journal article supplement (PMC10717207)
Supplement: 12576_2014_354_MOESM6_ESM.pdf [file 12576_2014_354_MOESM6_ESM.pdf]

# Supplemental Table 1

**A**

| <b>Parameter</b> | <b>Value</b> |
|------------------|--------------|
| <b>a</b>         | <b>2</b>     |
| <b>b</b>         | <b>0.5</b>   |
| <b>c</b>         | <b>0.45</b>  |
| <b>d</b>         | <b>1</b>     |
| <b>e</b>         | <b>1</b>     |
| <b>f</b>         | <b>0.5</b>   |
| <b>g</b>         | <b>2</b>     |
| <b>h</b>         | <b>0.11</b>  |
| <b>K1</b>        | <b>2</b>     |
| <b>K2</b>        | <b>0.2</b>   |
| <b>N1</b>        | <b>3</b>     |
| <b>N2</b>        | <b>0.2</b>   |

**B**

| <b>Name</b> | <b>Initial value</b> |
|-------------|----------------------|
| <b>AC</b>   | <b>0.5</b>           |
| <b>cAMP</b> | <b>1</b>             |
| <b>Ca</b>   | <b>0.1</b>           |
| <b>PKA</b>  | <b>0.05</b>          |
