# Supplementary material
Source: PubMed Central journal article supplement (PMC10717207)

Supplemental Figure 2

A

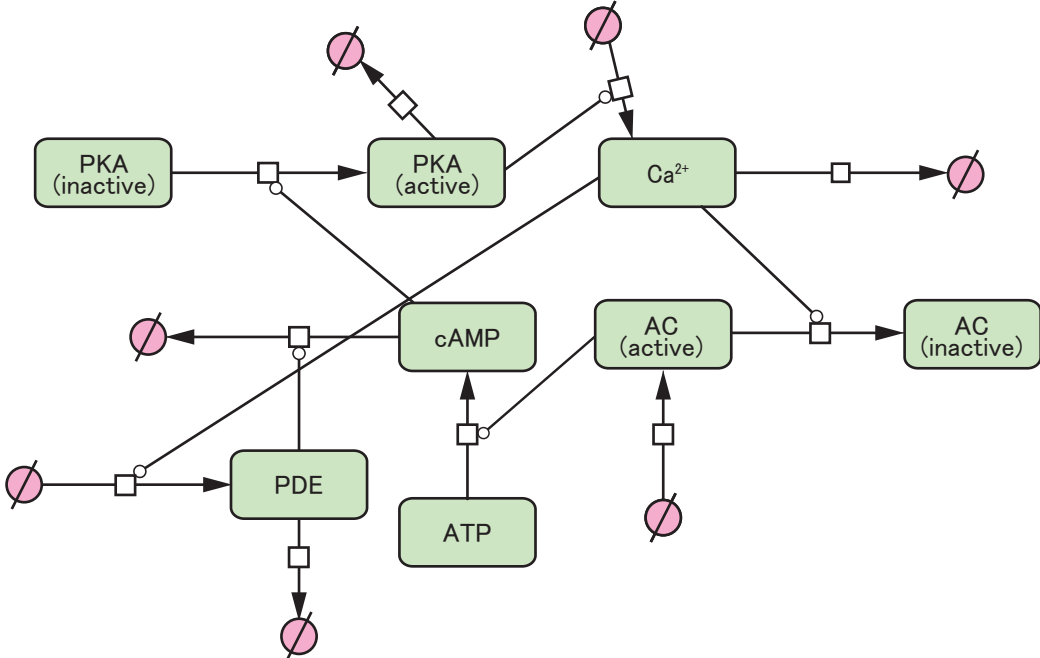

B

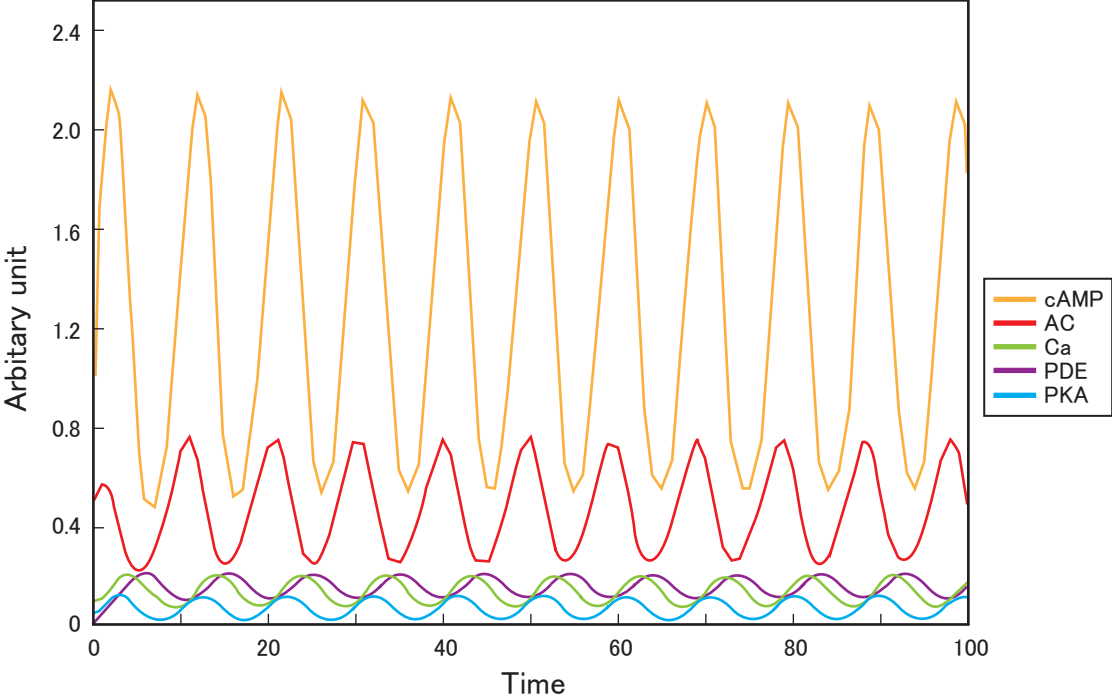

Supplement: 12576_2014_354_MOESM4_ESM.pdf [file 12576_2014_354_MOESM4_ESM.pdf]

Supplemental Figure 1

A

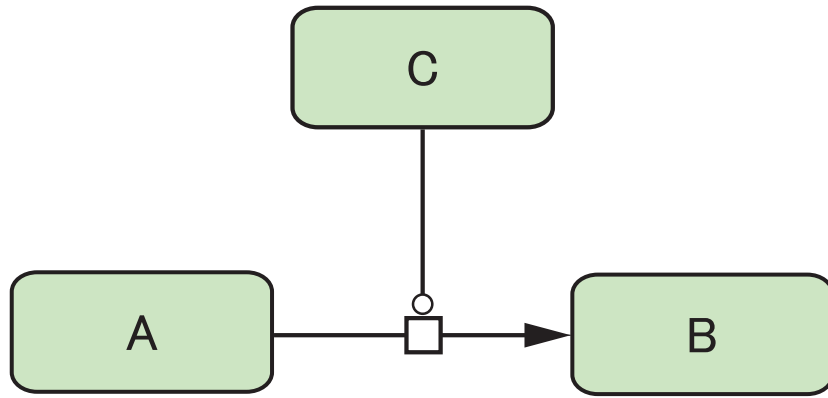

B

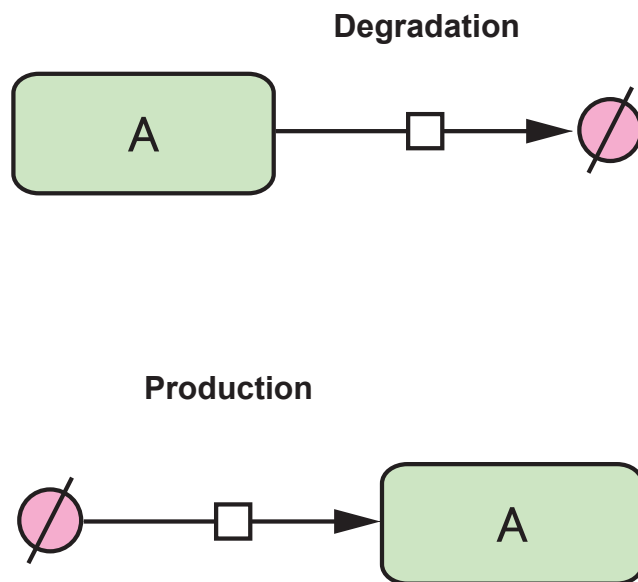

Supplement: 12576_2014_354_MOESM5_ESM.pdf [file 12576_2014_354_MOESM5_ESM.pdf]
